# Supplementary material for: 980 nm NIR light driven overall water splitting over a combined CdS–RGO–NaYF4–Yb3+/Er3+ photocatalyst
Source: Royal Society of Chemistry journal article supplement (doi:10.1039/d0cy00256a), 2020-01-01
Supplement: d0cy00256a1.pdf [file d0cy00256a1.pdf]

Supporting information for

**980 nm NIR light driven overall water splitting over united CdS-RGO-NYF  
photocatalyst**

Wei Gao<sup>a,b</sup>, Yuqi Wu<sup>b</sup>, Gongxuan Lu<sup>\*,b</sup>

<sup>a</sup> State Key Laboratory for Oxo Synthesis and Selective Oxidation, Lanzhou Institute  
of Chemical Physics, Chinese Academy of Sciences, Lanzhou 730000, China

<sup>b</sup> University of Chinese Academy of Sciences, Beijing 10080, China

\*Corresponding E-mail: [gxlu@lzb.ac.cn](mailto:gxlu@lzb.ac.cn)

## Additional Figures

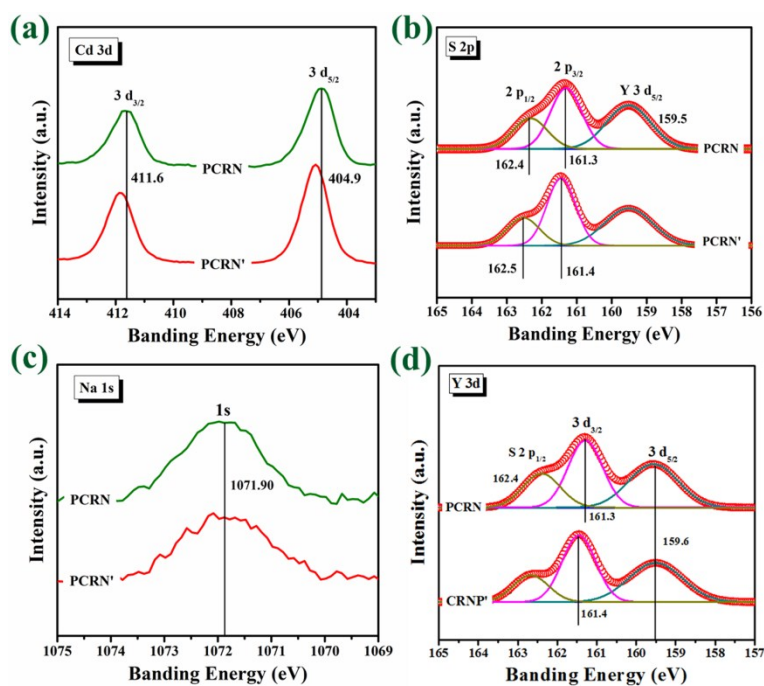

**Figure S1** XPS spectra of (a) Cd 3d, (b) S 2p, (c) Na 1s, (d) Y 3d in Pt/CdS/RGO/NYF before and after reaction. (PCRN, PCRN' are Pt/CdS/RGO/NYF before and after reaction).

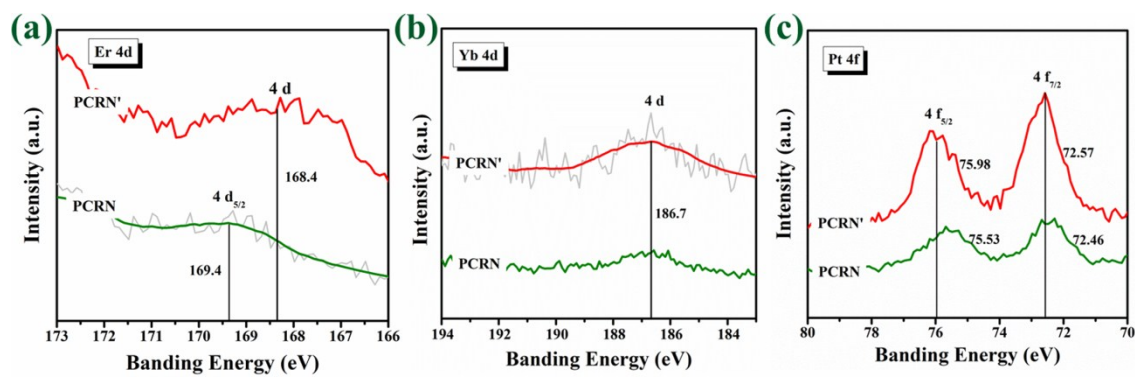

**Figure S2** XPS spectra of (a) Er, (b) Yb and (c) Pt elements before and after reaction. (PCRN, PCRN' are Pt/CdS/RGO/NYF before and after reaction).
